# Supplementary material for: Orientia tsutsugamushi Infection Stimulates Syk-Dependent Responses and Innate Cytosolic Defenses in Macrophages
Source: MDPI journal article supplement (doi:10.3390/pathogens12010053), 2022-12-29
Supplement: s1 [file s1]

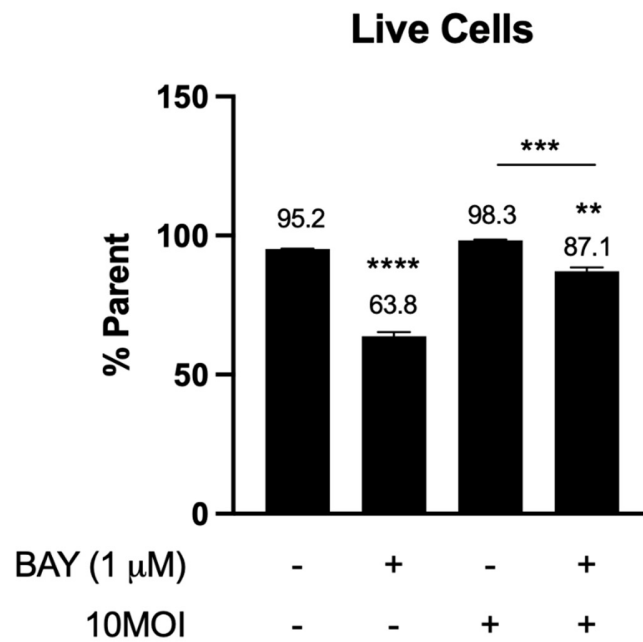

**Figure S1. Cellular viability in the presence of BAY.** Bone marrow-derived M $\Phi$  were treated with 1.0  $\mu$ M BAY for 30 min prior to infection with *O. tsutsugamushi* (10 MOI). Viability was assessed at 6 hpi via live-dead staining. One-way ANOVA with Dunnett's multiple comparison test was performed across all treatment groups, using mock controls as the reference. \*\*,  $p < 0.01$ ; \*\*\*,  $p < 0.0001$ ; \*\*\*\*,  $p < 0.0001$ .

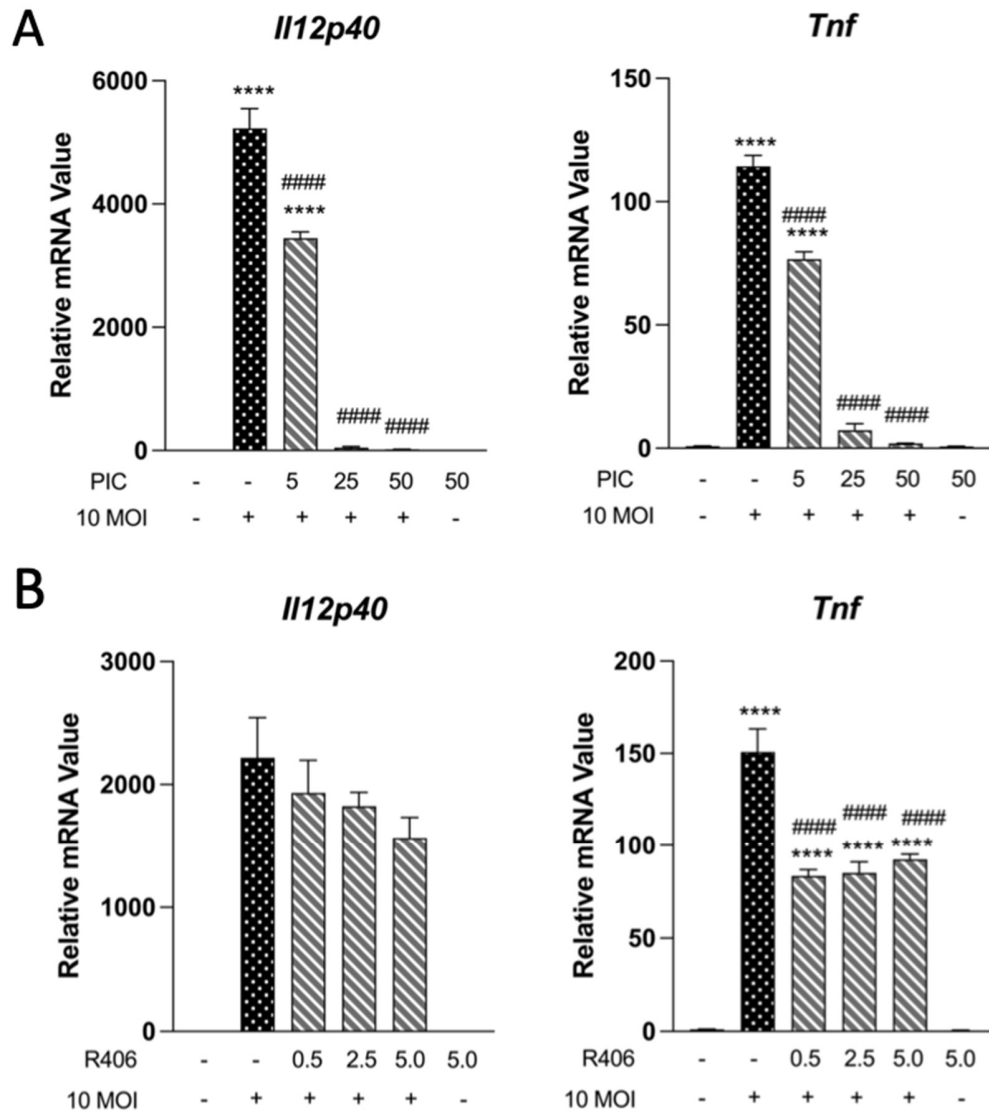

**Figure S2. PIC and R406 exhibit different capacities to abrogate type 1 responses during infection.** Bone marrow-derived MΦ were treated with Syk-inhibitors for 30 min prior to infection with *O. tsutsugamushi* (10 MOI). (A) Effect of PIC (5, 25, and 50 μM, respectively) on target genes at 6 hr post-infection. (B) Effect of R406 (0.5, 2.5, 5.0 μM) on target genes at 6 hr post-infection. qRT-PCR analyses of target genes relative to GAPDH are shown as mean ± SEM. One-way ANOVA with Dunnett's multiple comparison test was performed across all treatment

groups. For groups in comparison to mock controls: \*\*\*\*,  $p < 0.0001$ . For infected-and-treated groups in comparison to infected-but-untreated samples: ####,  $p < 0.0001$ .

**Table S1.** Primers for qRT-PCR analysis

| Gene Target             | Forward 5'-3'           | Reverse 5'-3'           |
|-------------------------|-------------------------|-------------------------|
| <i>Clec4e</i> (Mincle)  | AGTGCTCTCCTGGACGATAG    | CCTGATGCCTCACTGTAGCAG   |
| <i>Clec5a</i> (MDL-1)   | TCGGGGCTTATCGTAGTAGTG   | TGTAGGCATGGTACTTTCGTCAT |
| <i>Clec6a</i> (Dectin1) | AAGCGGAGCAGAATTTTCATCA  | CCATTTGCCATTACCTTGTGGA  |
| <i>Clec12a</i>          | AGAAGTCTGACAAATGTGGGGG  | CCAATGAACAGCAGAAGGCATA  |
| <i>Il12p40</i>          | GGAAGCACGGCAGCAGAATAA   | CTTGAGGGGAGAAGTAGGAATG  |
| <i>Il27p28</i>          | CTGTTGCTGCTACCCTTGCTT   | CACTCCTGGCAATCGAGATTC   |
| <i>MerTK</i>            | CAGGGCCTTTACCAGGGAGA    | TGTGTGCTGGATGTGATCTTC   |
| <i>Mx1</i>              | GACCATAGGGGTCTTGACCAA   | AGACTTGCTCTTTCTGAAAAGCC |
| <i>Oas1b</i>            | GGGCCTCTAAAGGGGTCAAG    | TCAAACCTCACTCCACAACGTC  |
| <i>Oas2</i>             | TTGAAGAGGAATACATGCGGAAG | GGGTCTGCATTACTGGCACTT   |
| <i>Oas3</i>             | TCTGGGGTCGCTAAACATCAC   | GATGACGAGTTCGACATCGGT   |
| <i>Tnf</i>              | CCCTCACACTCAGATCATCTTCT | GCTACGACGTGGGCTACAG     |
| GAPDH                   | TGGAAAGCTGTGGCGTGAT     | TGCTTCACCACCTTCTTGAT    |
